# Supplementary material for: Foxd1-dependent induction of a temporal retinal character is required for visual function
Source: Oxford University Press journal article supplement (doi:10.1242/dev.200938), 2022-12-14
Supplement: dev200938supp.pdf [file dev200938supp.pdf]

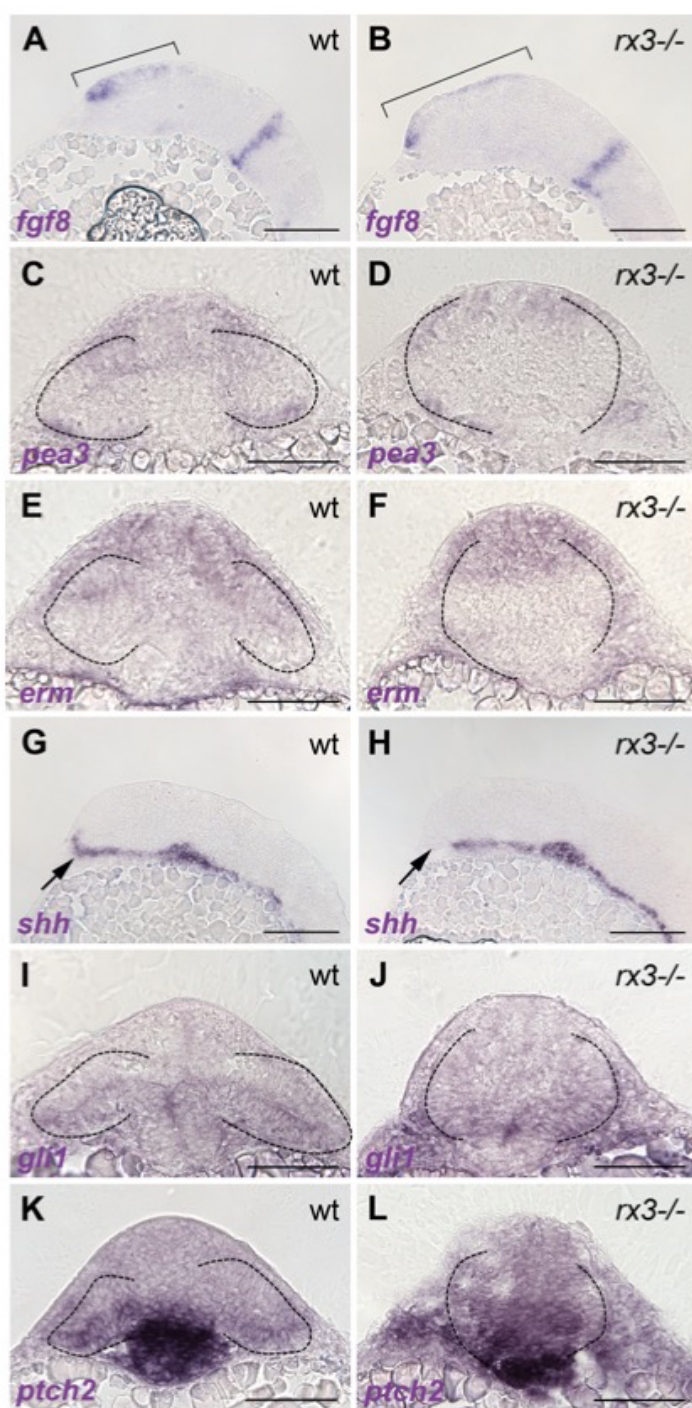

**Fig. S1. expression of Fgf and Shh pathway genes is similar in  $rx3^{-/-}$  mutants and siblings.** (A-L) Sagittal (A,B; G,H) and frontal sections at the level of the forming telencephalon, optic vesicles and hypothalamus (C-F;I-L), with dorsal up. Genes analysed and genotypes are shown bottom left and top right respectively. Brackets in (A-B) highlight the extent of *fgf8* expression in the prospective telencephalon; arrows in (G-H) highlight the extent of *shh* expression in the anterior hypothalamus. All embryos are 10ss.

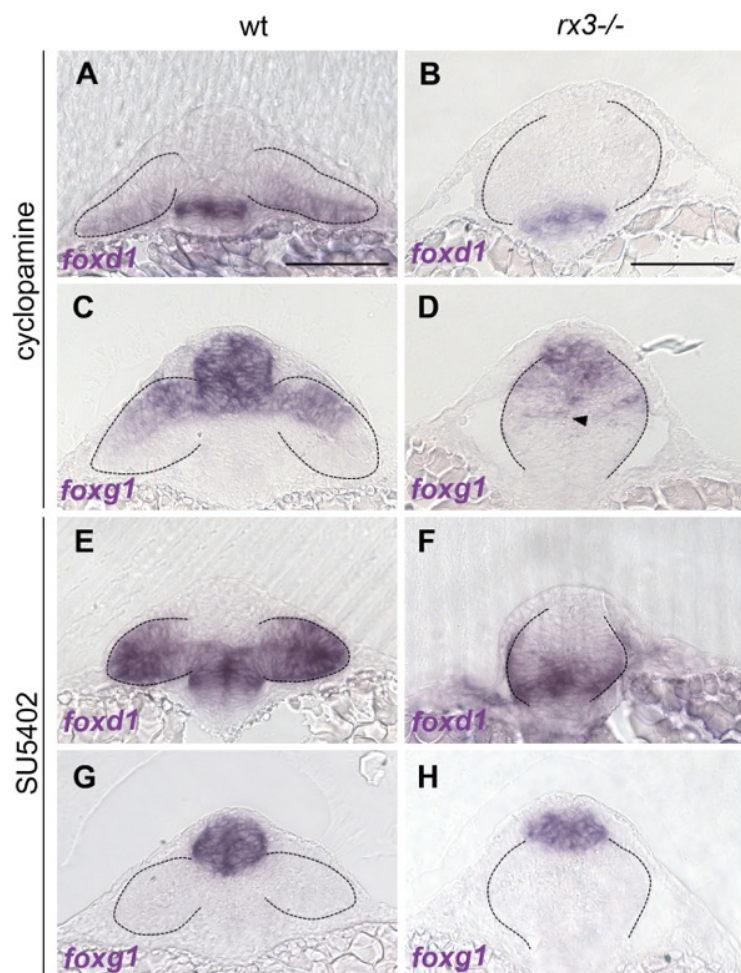

**Fig. S1. abrogation of Shh or Fgf activity in *rx3* mutant embryos.**

Frontal sections at the level of the forming telencephalon, optic vesicles and hypothalamus with dorsal up. Genes analysed and genotypes are shown bottom left and top respectively.

(A-D) Cyclopamine treated 10ss *rx3*<sup>-/-</sup> (B,D) and sibling embryos (A,C).

(E-H) SU5402 treated 10ss *rx3*<sup>-/-</sup> (F,H) and sibling embryos (E,G).

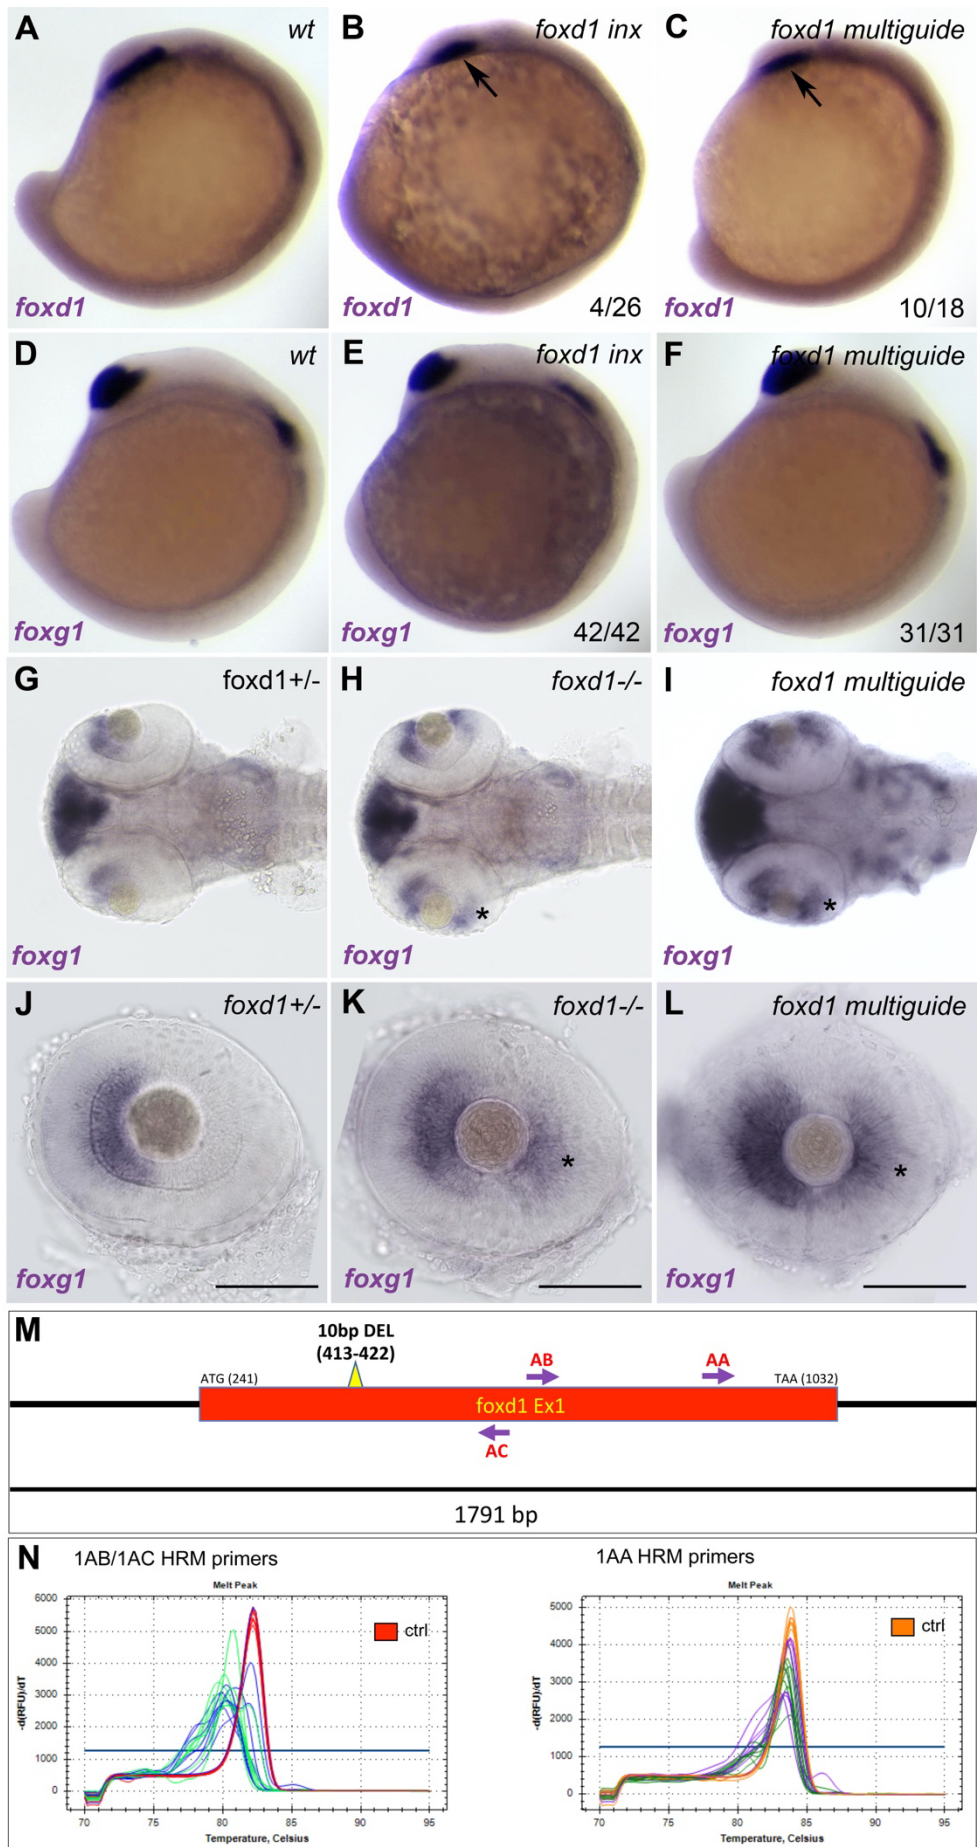

**Fig. S3. *foxd1* “crispants” reproduce the *foxd1* expression expansion phenotype observed in *foxd1* mutants.** (A-F) Lateral views of 12-14hpf wild type (A,D), *foxd1*<sup>-/-</sup> mutants (B,E) and *foxd1* crispants (C,F) labelled with *foxd1* (A-C) or *foxd1* (D-F). Note the reduced *foxd1* domain in *foxd1* mutants (arrow, B) and crispants (arrow, C). (G-L) dorsal views of brains and eyes (G-I) and lateral views of eyes (J-L) showing *foxd1* expression in 60-72hpf wildtype (G,J), *foxd1*<sup>-/-</sup> mutants (H,K) and *foxd1* crispants (I,L). Note the expansion of *foxd1* to the temporal retina (asterisk in H-I,K-L). (M) Schematic of the *foxd1* locus with the regions targeted by the CRISPR guides highlighted. (N) HRM profile in crispant embryos as compared to the wildtype profile. Two sets of primers were used to assess *indels* induced by guide 1AA (right panel) and guides 1AB/1AC (left panel). The red profile on the left panel and orange profile on the right panel correspond to wildtype controls. All genotyped embryos showed *indels* in both regions.

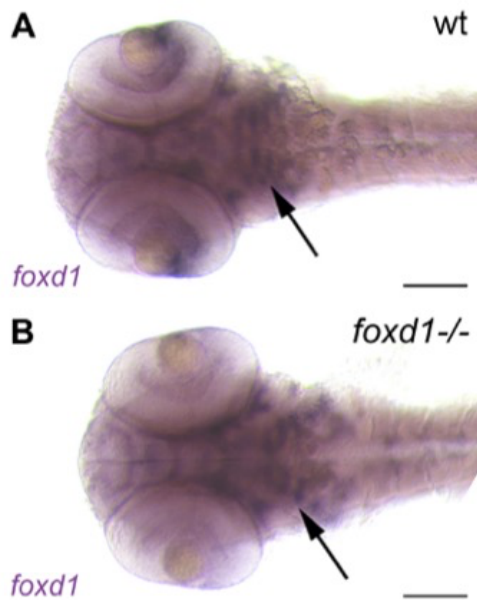

**Fig. S4. loss of *foxd1* expression in the temporal retina of *foxd1* mutants is not due to nonsense-mediated RNA decay.** Ventral views of heads showing *foxg1* expression in 60-72hpf wildtype (A) and *foxd1*<sup>-/-</sup> mutants (B). Note *foxd1* expression in the brain and branchial arches regions (arrows) is maintained in *foxd1*<sup>-/-</sup> mutants (B, compare to A), despite being absent in the retina. Anterior is to the left.

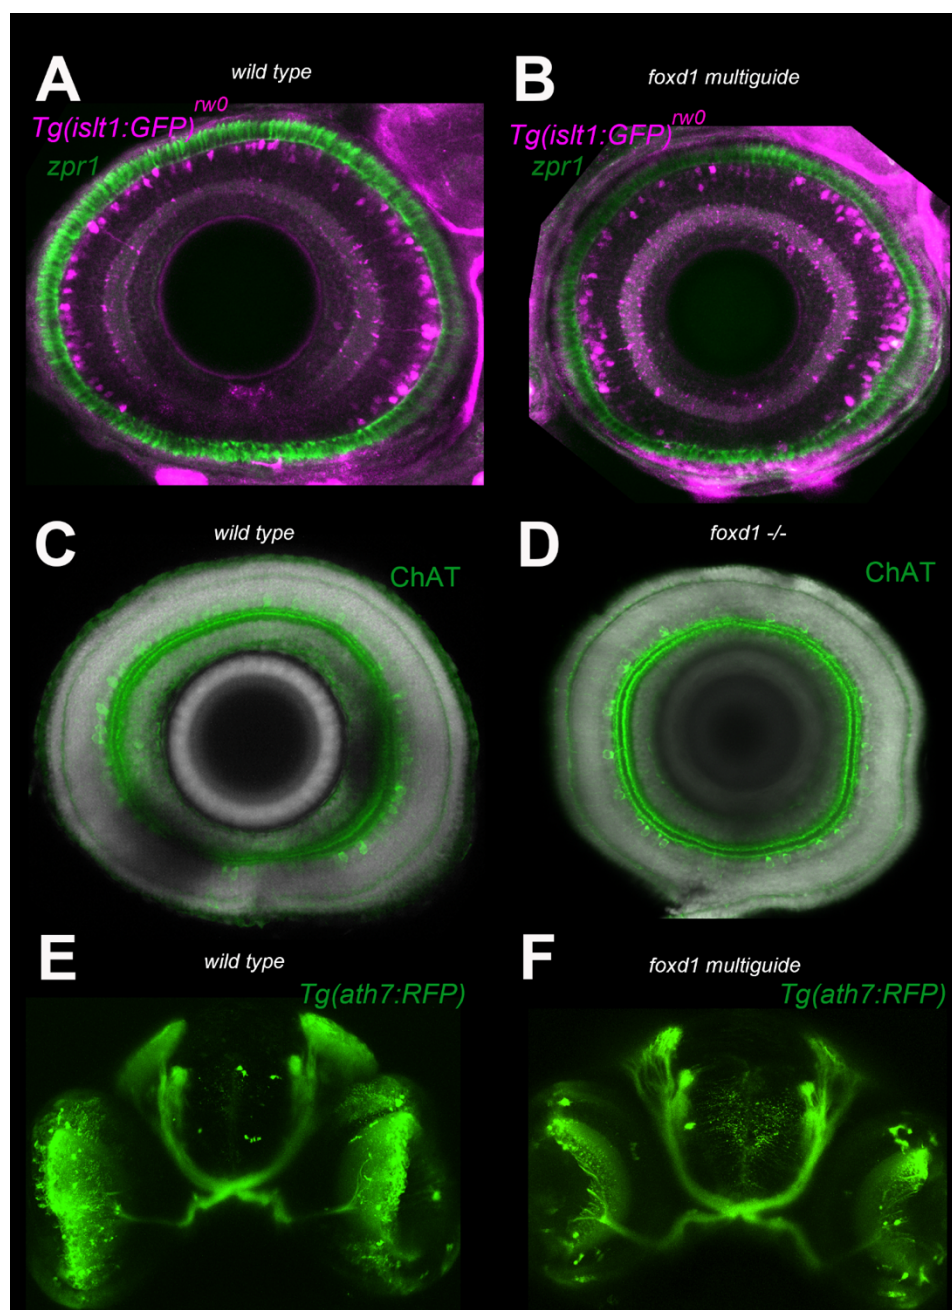

**Fig. S5. retinal architecture and chiasma integrity are normal in the loss of *foxd1*.** (A-B) Sagittal section across a wildtype (A) and *foxd1* crisprant (B) eye immunostained with anti-zpr1 (red and green cones, green) and anti-GFP (amacrine and retinal ganglion cells, (*Tg(islt1:GFP)*, magenta) in 8 dpf larvae. (C-D) Immunostaining with anti-Choline Acetyltransferase (ChAT, green) and DAPI (grey) in 7 dpf wild types (C) and *foxd1*<sup>-/-</sup> mutants (D). (E-F) Frontal view of wild type (E) and *foxd1* crisprant (F) 4 dpf larvae highlighting RGC projections (*tg(ath7:GFP)*, green). All crisprant embryos analysed carry *indels* as confirmed by HRM analysis (not shown).

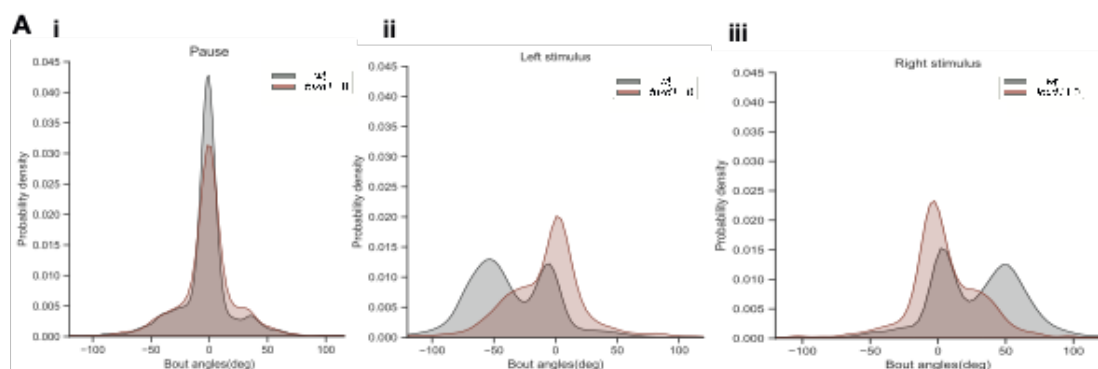

**Fig. S6.** range of swim bout angles is similar in wildtype and *foxd1* larvae. Probability densities of swim bout angles for wildtype and *foxd1* crispant larvae, during the pause interval (i), the leftwards (ii) and rightwards (iii) oriented whole field motion stimulus.

**Table S1.** Crispr guides and genotyping primers

| Primers used                   | Sequence                              |
|--------------------------------|---------------------------------------|
| foxd1 original CRISPR guide    | GCTTGTAGGGGTCCCGTGC                   |
| foxd1 original CRISPR-STAT-fwd | TGTAACACGACGGCCAGTTCAGATGCACGACGAGATC |
| foxd1 original CRISPR-STAT-rev | GTGTCTTGTCACAAATCTCGCTCAGC            |
| foxd1 original CRISPR HRM-fwd  | CAGATGCACGACGAGATCCT                  |
| foxd1 original CRISPR HRM-rev  | GAAGTCACAAATCTCGCTCAGC                |
| foxd1.1AA guide                | GGCTATGGACCCTACGGTTG                  |
| foxd1.1AB guide                | TCAAGATACCACGAGAGCCC                  |
| foxd1.1AC guide                | CGGATAGAGTTCTGCCAAGC                  |
| foxd1-1AB/1AC HRM-fwd          | GCTGAGCGAGATTTGTGACTTC                |
| foxd1-1AB/1AC HRM-rev          | CTAGCGTCCAGTAGTTGCCTTTG               |
| foxd1-1AA HRM-fwd              | GCGAGCACGGAGGTTTTCTTCC                |
| foxd1-1AA HRM-rev              | GAAAGGCGAGGAGCGCGGAATG                |

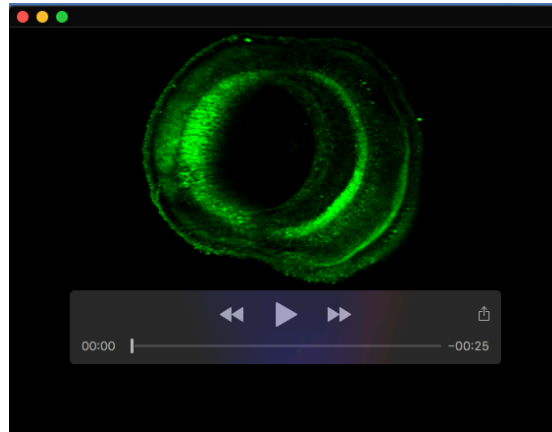

**Movie 1.** 3D Imaging of a 7dpf wildtype eye immunostained with anti-*PKCa* antibody (green). All movies are oriented with nasal to the left and dorsal up.

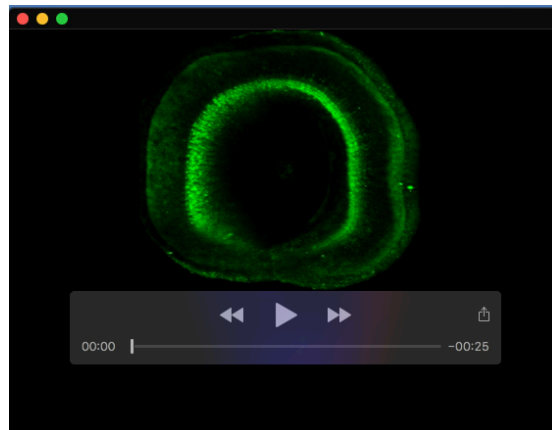

**Movie 2.** 3D Imaging of a 7dpf *foxd1*<sup>-/-</sup> mutant eye immunostained with anti-*PKCa* antibody (green).

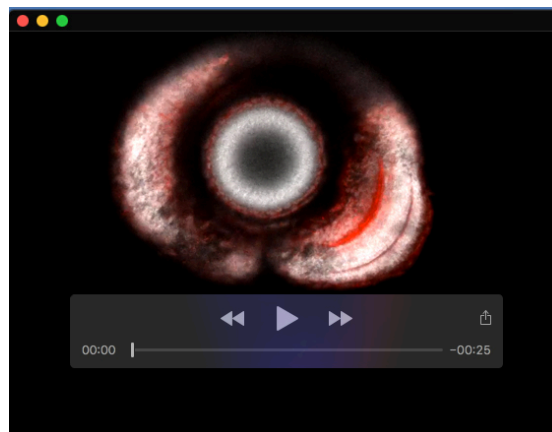

**Movie 3.** z-stack of a 7dpf wildtype eye immunostained with anti-ChAT (red) and counterstained with DAPI (grey).



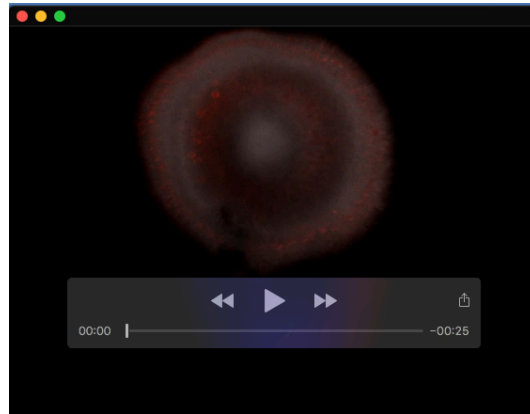

**Movie 4.** z-stack of a 7dpf *foxdl*<sup>-/-</sup> mutant eye immunostained with anti-ChAT (red) and counterstained with DAPI (grey).

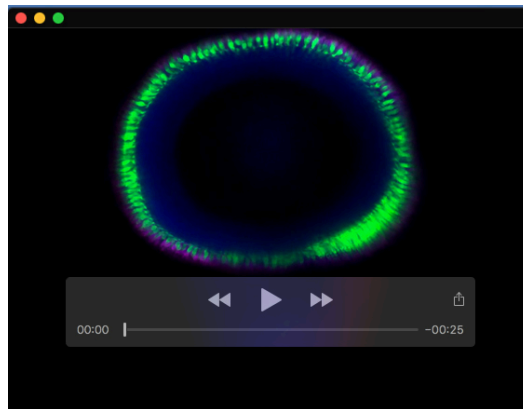

**Movie 5.** z-stack of a 8dpf *Tg(opn1sw1:GFP)*, wildtype eye immunostained with anti-GFP (UV cones, green), anti-zpr1 (green and red cones, magenta) and counterstained with DAPI (blue).

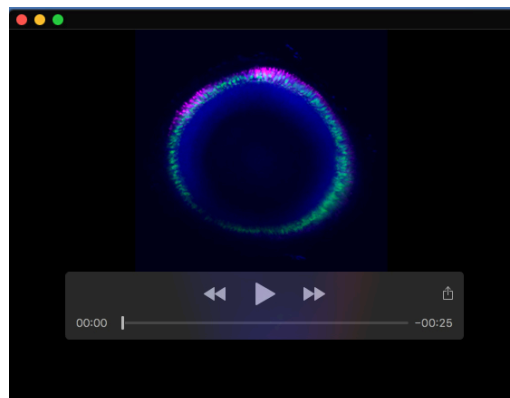

**Movie 6.** z-stacks of a 8dpf *Tg(opn1sw1:GFP)*, *foxdl* crispant eye immunostained with anti-GFP (UV cones, green), anti-zpr1 (green and red cones, magenta) and counterstained with DAPI (blue).
